# Supplementary material for: Highly durable Pt nanoparticle-supported carbon catalysts for the oxygen reduction reaction tailored by using an ionic liquid thin layer
Source: Royal Society of Chemistry journal article supplement (doi:10.1039/c6ta04859e), 2016-01-01
Supplement: c6ta04859e4.pdf [file c6ta04859e4.pdf]

## Highly-Durable Pt Nanoparticle-Supported Carbon Catalyst for the Oxygen Reduction Reaction Tailored by an Ionic Liquid Thin Layer

Kazuki Yoshii,<sup>a</sup> Keisuke Yamaji,<sup>a</sup> Tetsuya Tsuda,<sup>a,\*</sup> Hiroaki Matsumoto,<sup>b</sup> Takeshi Sato,<sup>b</sup>

Reiko Izumi,<sup>a</sup> Tsukasa Torimoto<sup>c</sup> and Susumu Kuwabata<sup>a,\*</sup>

<sup>a</sup> Department of Applied Chemistry, Graduate School of Engineering, Osaka University, 2-1 Yamadaoka, Suita, Osaka 565-0871, Japan

<sup>b</sup> Science and Medical Systems Business Group, Hitachi High-Technologies Corporation, Hitachinaka, Ibaraki 312-0057, Japan

<sup>c</sup> Department of Crystalline Materials Science, Graduate School of Engineering, Nagoya University Furo-cho, Chikusa-ku, Nagoya, Aichi 464-8603, Japan

### Electronic Supplementary Information

Figure S1 - S5 p. 2

Captions for Movie S1 - S3 p. 7

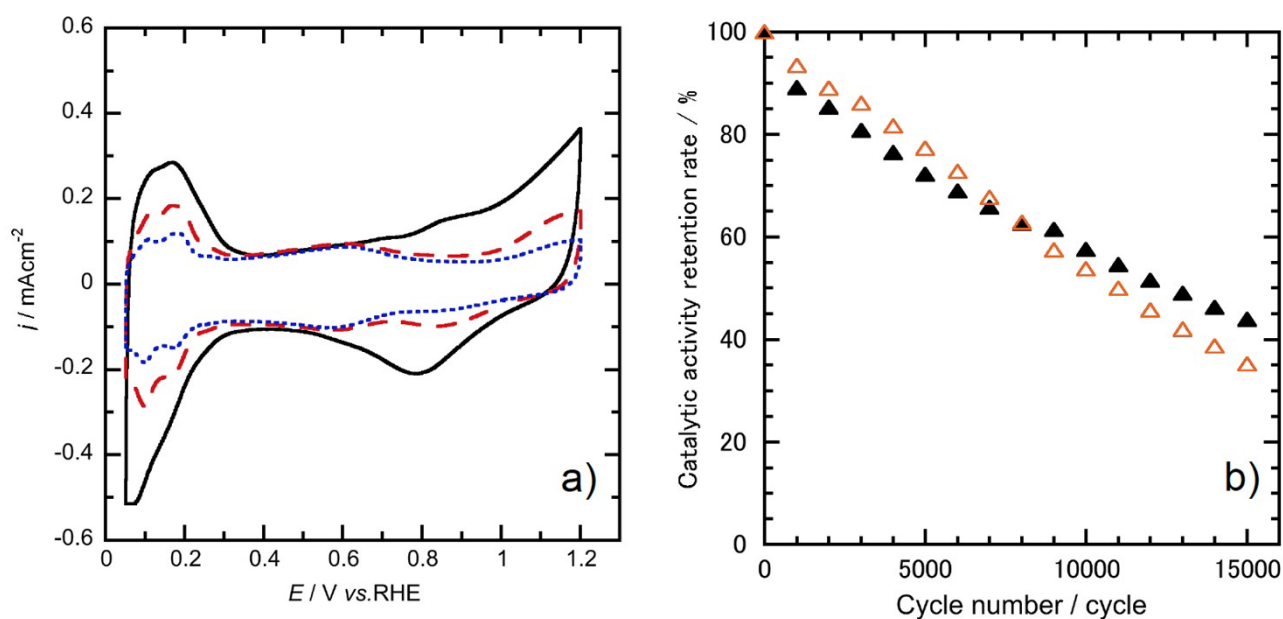

**Fig. S1** a) Cyclic voltammograms recorded at a TEC10V30E-IL after (—) 0, (---) 7000, and (.....) 15000 cycle potential tests. b) Variation in the catalytic activity retention rate for the ECSA estimated at the (▲) TEC10V30E and (△) TEC10V30E-IL as a function of cycle number. The electrolyte was a  $\text{N}_2$ -saturated 0.1 M  $\text{HClO}_4$  aqueous solution at room temperature, and the scan rate was  $10 \text{ mV s}^{-1}$ .

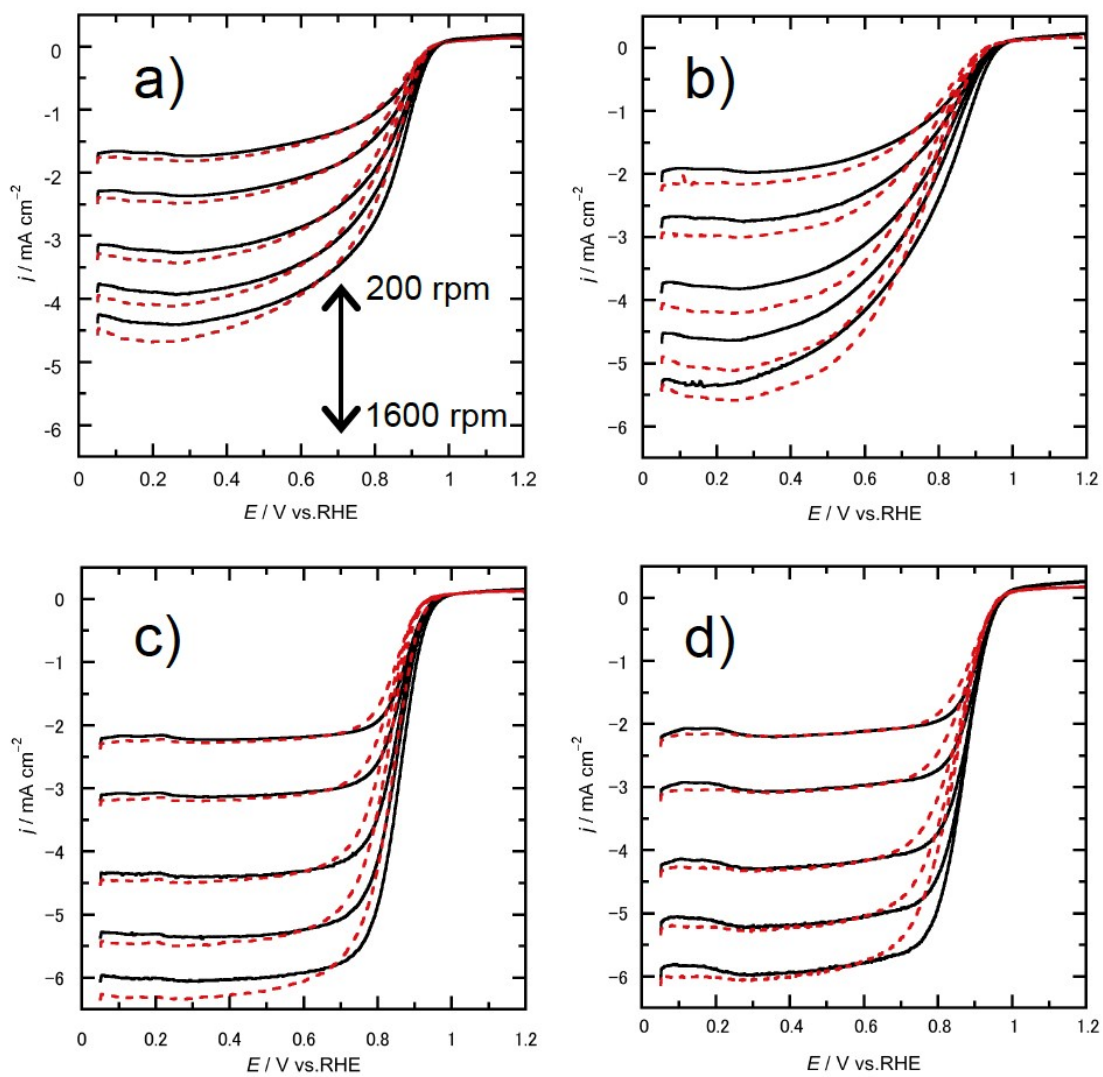

**Fig. S2** Hydrodynamic voltammograms recorded at: a) Pt-SWCNTs, b) Pt-SWCNTs<sub>conv</sub>, c) Pt-Vulcan<sup>®</sup>, and d) TEC10V30E catalysts (—) before and (---) after 15000 cycle tests. The voltammetric experiments were conducted in O<sub>2</sub>-saturated 0.1 M HClO<sub>4</sub> aqueous solution at room temperature. The scan rate of 10 mV s<sup>-1</sup>. The rotation speeds for the electrodes were, 200, 400, 800, 1200, and 1600 rpm.

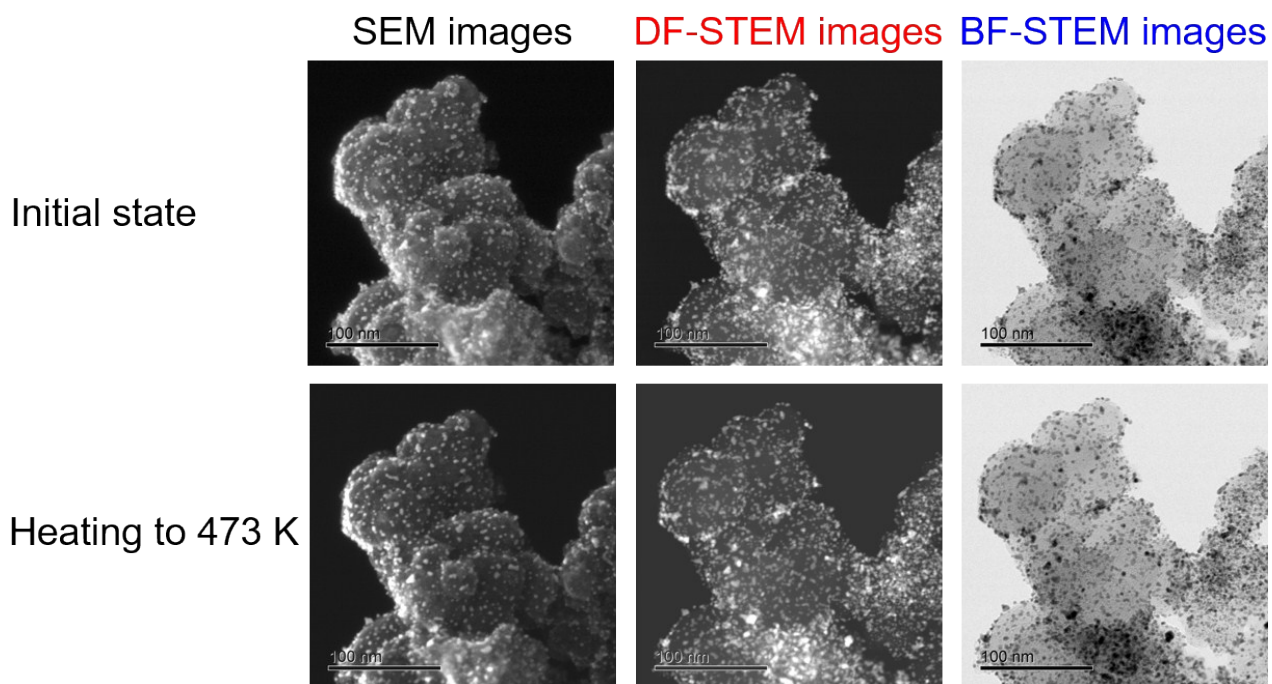

**Fig. S3** SEM, annular dark-field STEM (DF-STEM), and bright-field STEM (BF-STEM) images of TEC10V30E before and after heating to 473 K under vacuum conditions ( $5.75 \times 10^{-5}$  Pa). The accelerated voltage was 300 kV.

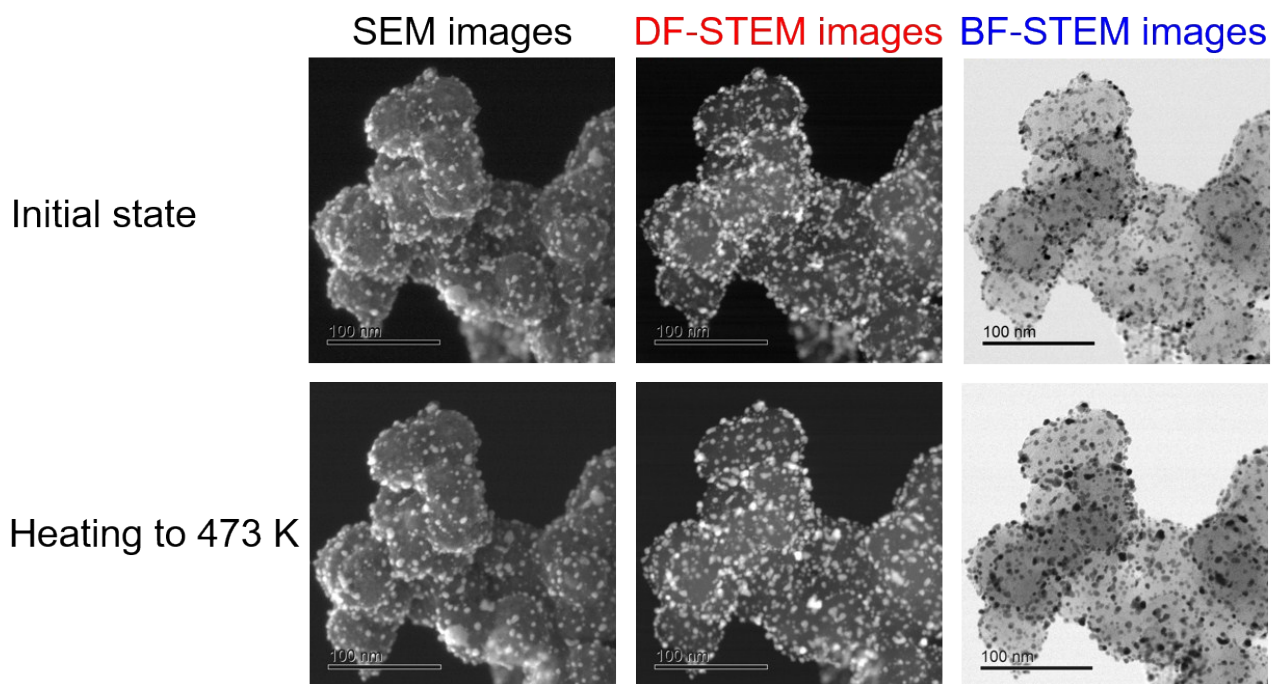

**Fig. S4** SEM, annular dark-field STEM (DF-STEM), and bright-field STEM (BF-STEM) images of Pt-Vulcan<sup>®</sup> before and after heating to 473 K under vacuum conditions ( $5.75 \times 10^{-5}$  Pa). The accelerated voltage was 300 kV.

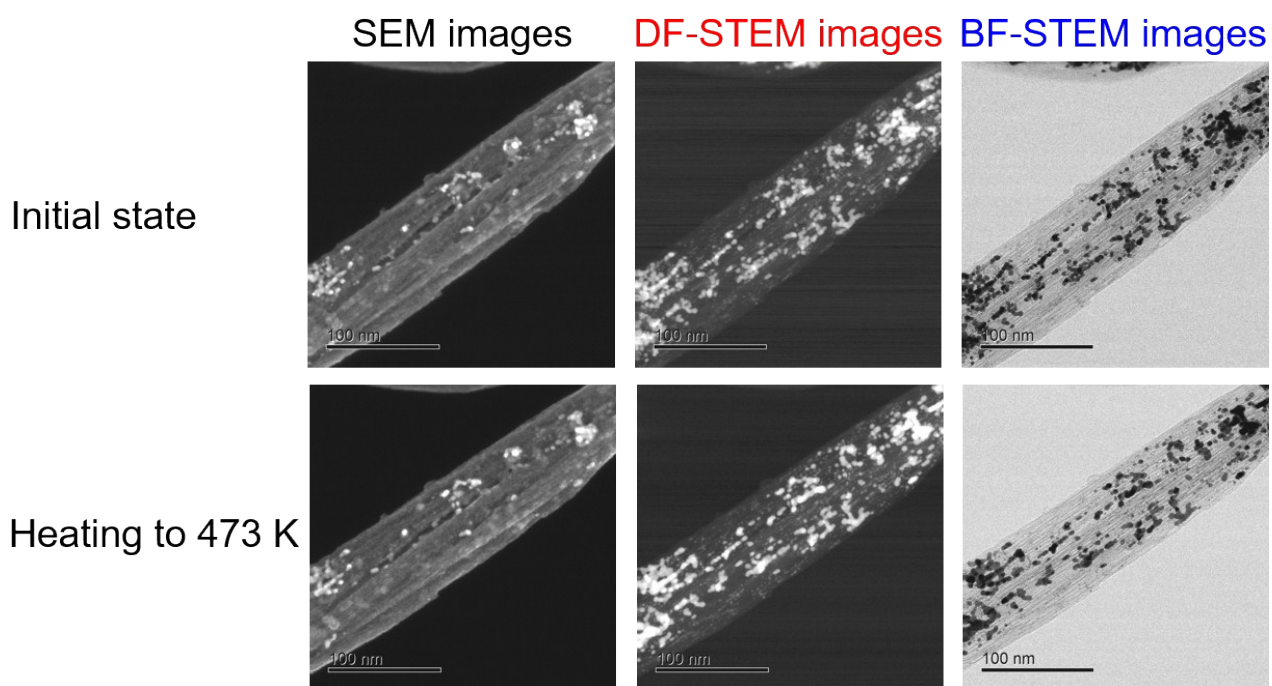

**Fig. S5** SEM, annular dark-field STEM (DF-STEM), and bright-field STEM (BF-STEM) images of Pt-SWCNTs before and after heating to 473 K under vacuum conditions ( $5.75 \times 10^{-5}$  Pa). The accelerated voltage was 300 kV.

### **Captions for Movie S1 - S3**

**Movie S1** (Left) SEM and (Right) annular dark-field STEM (DF-STEM) images of TEC10V30E before and after heating to 473 K under vacuum conditions ( $5.75 \times 10^{-5}$  Pa). The accelerated voltage was 300 kV.

**Movie S2** (Left) SEM and (Right) annular dark-field STEM (DF-STEM) images of Pt-Vulcan<sup>®</sup> before and after heating to 473 K under vacuum conditions ( $5.75 \times 10^{-5}$  Pa). The accelerated voltage was 300 kV.

**Movie S3** (Left) SEM and (Right) annular dark-field STEM (DF-STEM) images of Pt-SWCNTs before and after heating to 473 K under vacuum conditions ( $5.75 \times 10^{-5}$  Pa). The accelerated voltage was 300 kV.
